# Supplementary material for: Mammalian SRP receptor switches the Sec61 translocase from Sec62 to SRP-dependent translocation
Source: PubMed Central journal article supplement (PMC4686813; doi:10.1038/ncomms10133), 2015-12-04
Supplement: ncomms10133-s1.pdf [file ncomms10133-s1.pdf]

## Supplementary Figures

**a**

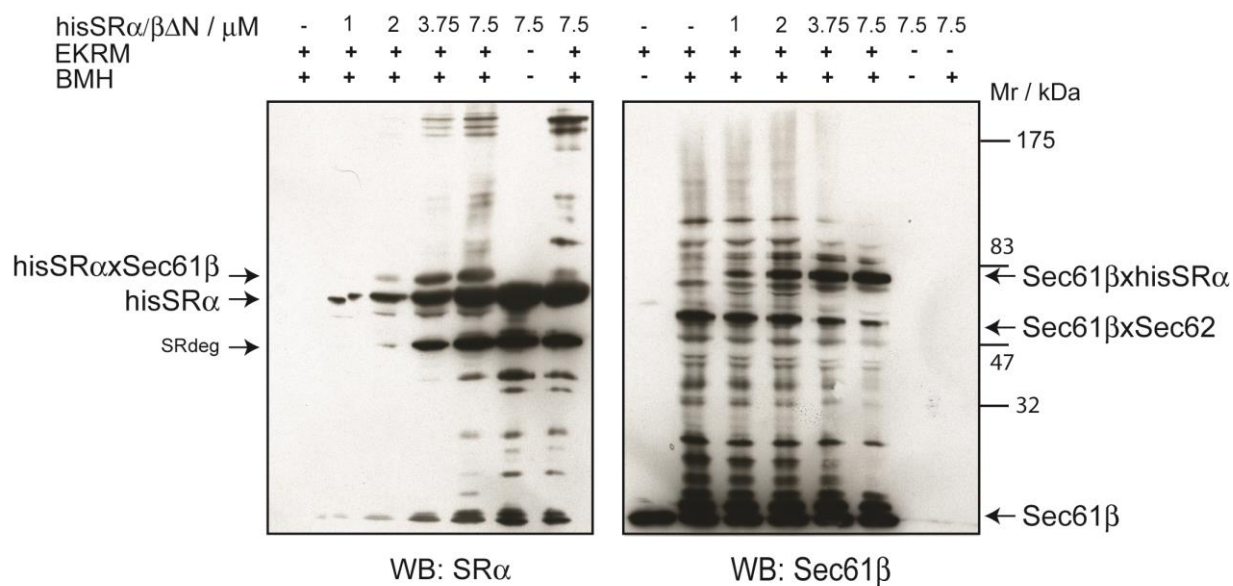

**b**

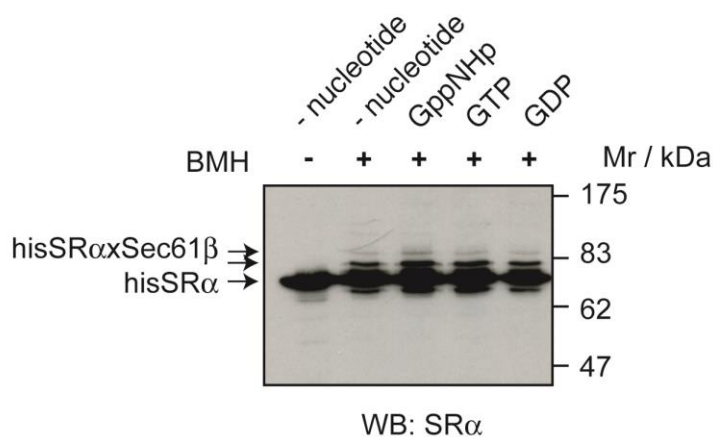

### Supplementary Figure 1 SR $\alpha$ binds the Sec61 translocase in proximity to Sec61 $\beta$

**a.** EKRM (32 eq) or buffer were incubated with the indicated concentrations of hisSR $\alpha$ / $\beta\Delta N$ . Cross-linking was then induced with BMH (10  $\mu M$ ) and samples analysed in parallel on the same SDS-PAGE gel followed by Western blot with SR $\alpha$  or Sec61 $\beta$  antisera. A degradation product of SR $\alpha$ , which contains the SR $\alpha$  antibody epitope is indicated (SR-deg).

**b.** hisSR $\alpha$ / $\beta\Delta N$  (2  $\mu M$ ) was incubated with EKRM in the presence of the indicated nucleotides (1 mM). Cross-linking was then induced with BMH (10  $\mu M$ ) and samples were then analysed by SDS-PAGE gel followed by Western blot with SR $\alpha$  antisera.

a

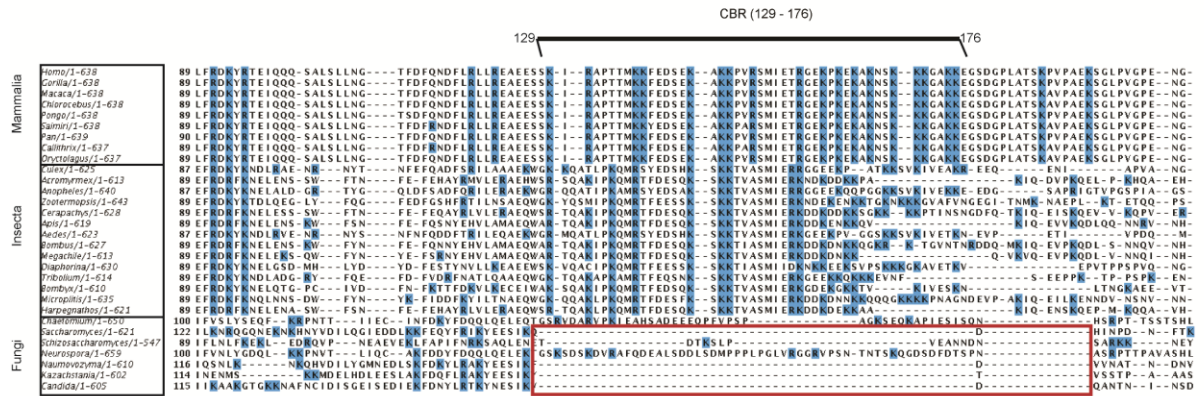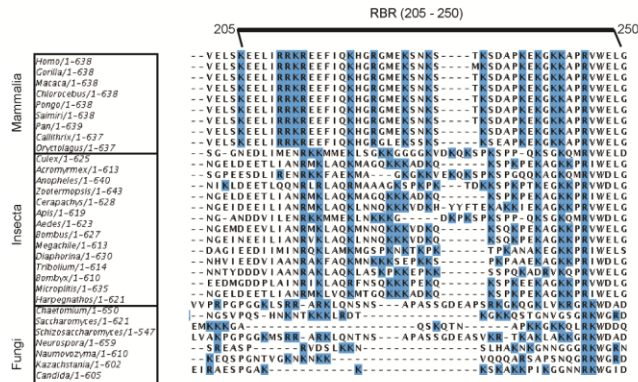

b

*Chaetomium thermophilum*

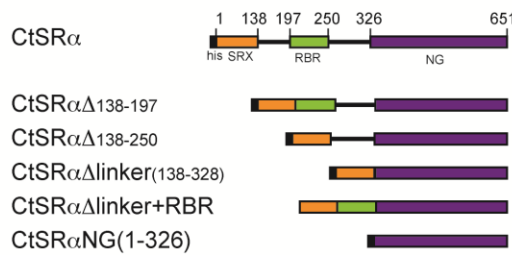

**Supplementary Figure 2 Alignment of SRα linker domains**

a. Linker domain regions of SRα from indicated eukaryotic species was compared using Clustal omega<sup>1</sup>. Positions of the mammalian-specific CBR and conserved RBR sub-domains are indicated by a bar on the top (numbering refers to human SRα).

b. Schematic of linker domain mutant constructs for *Chaetomium* SRα. Note that the RBR domain is conserved between Human and *Chaetomium* whereas the CBR domain is not.

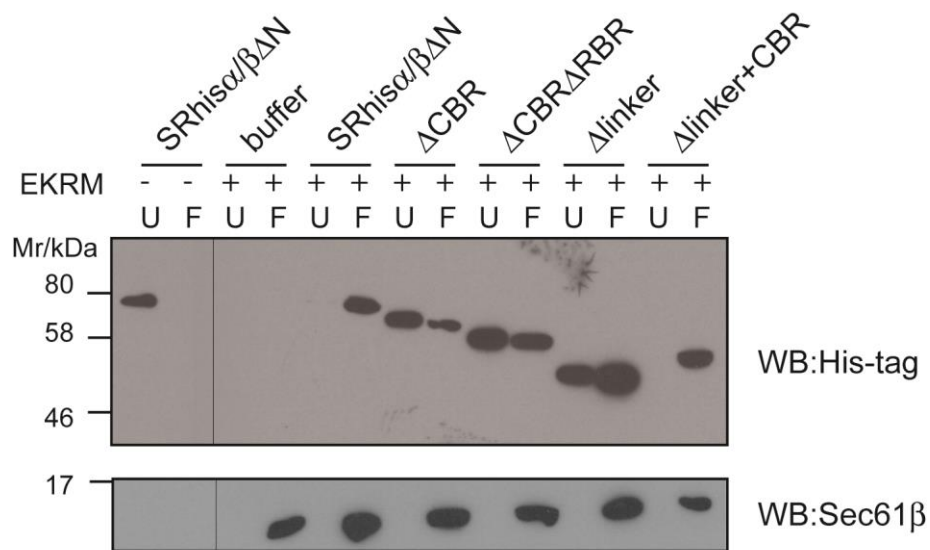

**Supplementary Figure 3 SR $\alpha$  Linker domain mutants still associate with membranes**

hisSR $\alpha$ / $\beta$  $\Delta$ N and the indicated linker domain mutants were incubated either with buffer or EKRM for 15 minutes at 25°C. Membranes were then recovered by flotation through a Nycodenz cushion. Floated (F) and unfloated (U) fractions were analysed by SDS-PAGE and western blot using anti-his-tag and anti-Sec61 $\beta$  antibodies.

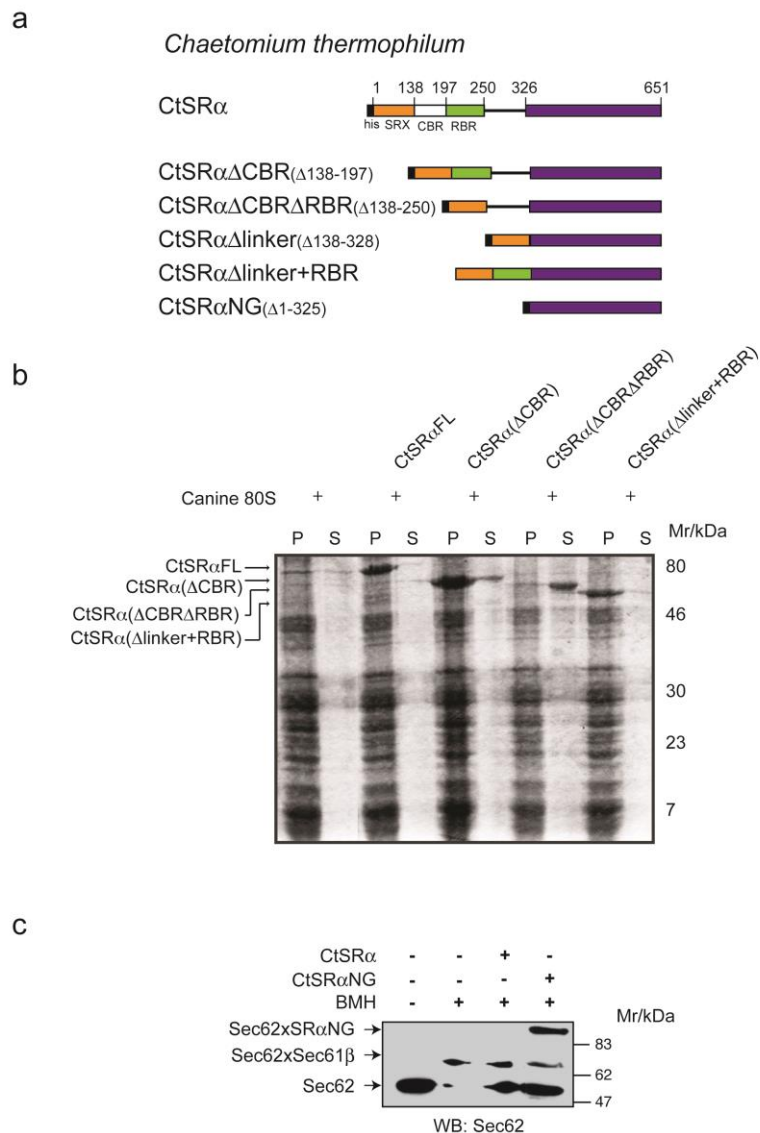

**Supplementary Figure 4 Interaction of *Chaetomium thermophilum* (Ct) SR $\alpha$  with mammalian ribosomes and Sec62.**

**a.** Schematic of *Chaetomium thermophilum* (Ct) SR truncation constructs.

**b.** Full length CtSR $\alpha$  and indicated linker mutants were purified and then incubated with high-salt washed canine pancreatic ribosomes. Following binding, ribosomes were recovered by sedimentation and then ribosome-enriched pellet (P) and supernatant (S) fractions were analysed by SDS-PAGE and staining with Coomassie-Brilliant Blue.

**c.** Full length CtSR $\alpha$  and CtSR $\alpha$ NG were purified and then incubated with EKRM prior to cross-linking with BMH. Samples were analysed by SDS-PAGE and western blot with anti-Sec62 antiserum.

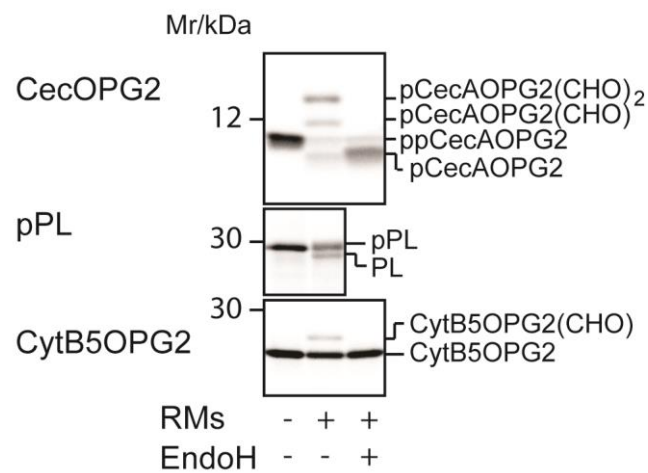

### Supplementary Figure 5 Identity of translocated precursors.

PreprocecropinA-OPG2 (CecOPG2), cytochrome B5-OPG2 (CytB5OPG2) and preprolactin (pPL) were translated *in vitro* in the presence or absence of microsomes (RM) and then where indicated treated with Endo H to remove any N-linked glycans. Samples were recovered by immunoprecipitation using anti-opsin tag or anti-pPL antibodies and analysed by SDS-PAGE and phosphorimaging.



Figure 3c complete blot image

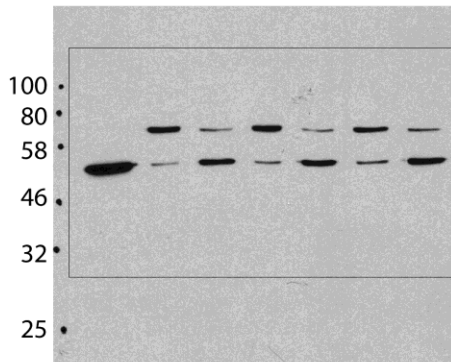

Figure 3d complete blot images

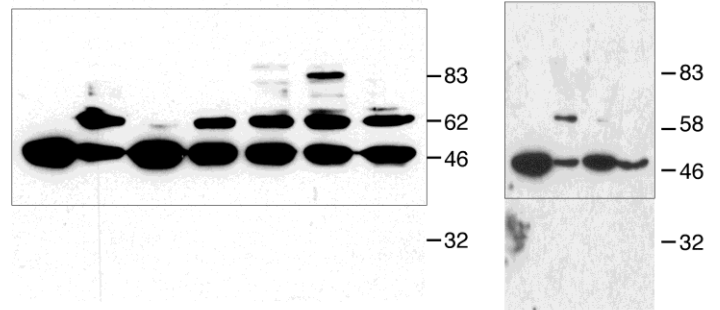

Figure 5a complete phosphorimager gel images

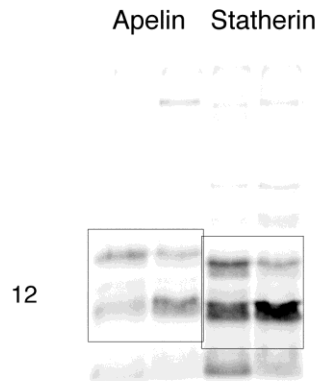

Prepro  
cecropin Cyt. B5

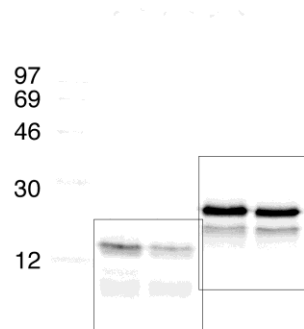

Figure 5b complete phosphorimager gel images

Preprocecropin

Preprolactin

Cytochrome B5

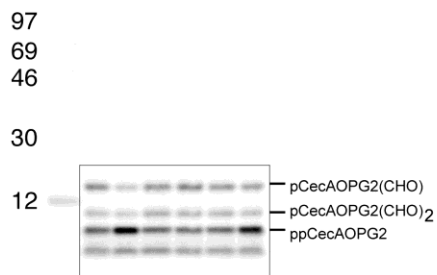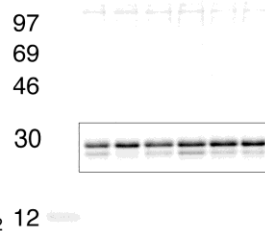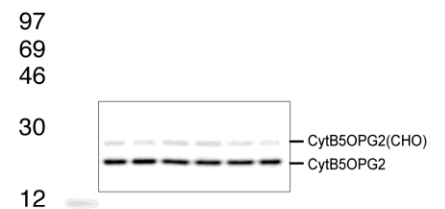

**Supplementary Figure 7 Complete gel images for cropped gel panels**  
Regions corresponding to panels in the main figures are boxed.

## Supplementary Reference

- 1 Sievers, F. *et al.* Fast, scalable generation of high-quality protein multiple sequence alignments using Clustal Omega. *Mol. Syst. Biol.* **7**, 539 (2011).
